# Supplementary material for: A method for developing standardised interactive education for complex clinical guidelines
Source: PubMed Central journal article supplement (PMC3533506; doi:10.1186/1472-6920-12-108), 2012-11-06
Supplement: 1472-6920-12-108-S1.pdf [file 1472-6920-12-108-S1.pdf]

## Evaluation

| Please rate the following aspects of this program: |                                                                                                       | Inadequate               | Poor                     | Average                  | Good                     | Excellent                |
|----------------------------------------------------|-------------------------------------------------------------------------------------------------------|--------------------------|--------------------------|--------------------------|--------------------------|--------------------------|
| 1.                                                 | This workshop has updated my <u>knowledge</u> in the management of perinatal loss.                    | <input type="checkbox"/> | <input type="checkbox"/> | <input type="checkbox"/> | <input type="checkbox"/> | <input type="checkbox"/> |
| 2.                                                 | This workshop has assisted me with updating my <u>clinical skills</u> in managing perinatal loss      | <input type="checkbox"/> | <input type="checkbox"/> | <input type="checkbox"/> | <input type="checkbox"/> | <input type="checkbox"/> |
| 3.                                                 | This workshop has assisted me with updating my <u>communication skills</u> in managing perinatal loss | <input type="checkbox"/> | <input type="checkbox"/> | <input type="checkbox"/> | <input type="checkbox"/> | <input type="checkbox"/> |
| 4.                                                 | I found the aims and objectives of the workshop to be:                                                | <input type="checkbox"/> | <input type="checkbox"/> | <input type="checkbox"/> | <input type="checkbox"/> | <input type="checkbox"/> |
| 5.                                                 | The workshop <u>coverage</u> of the aims and objectives was:                                          | <input type="checkbox"/> | <input type="checkbox"/> | <input type="checkbox"/> | <input type="checkbox"/> | <input type="checkbox"/> |
| 6.                                                 | The learning environment created by the tutors was:                                                   | <input type="checkbox"/> | <input type="checkbox"/> | <input type="checkbox"/> | <input type="checkbox"/> | <input type="checkbox"/> |
| 7.                                                 | The opportunity for hands on or interaction was:                                                      | <input type="checkbox"/> | <input type="checkbox"/> | <input type="checkbox"/> | <input type="checkbox"/> | <input type="checkbox"/> |
| 8.                                                 | The learning materials for the workshop were:                                                         | <input type="checkbox"/> | <input type="checkbox"/> | <input type="checkbox"/> | <input type="checkbox"/> | <input type="checkbox"/> |
| 9.                                                 | The venue and workshop set up was:                                                                    | <input type="checkbox"/> | <input type="checkbox"/> | <input type="checkbox"/> | <input type="checkbox"/> | <input type="checkbox"/> |
| 10.                                                | Overall I would rate the workshop as:                                                                 | <input type="checkbox"/> | <input type="checkbox"/> | <input type="checkbox"/> | <input type="checkbox"/> | <input type="checkbox"/> |

Please describe the key message you learnt at each of the workshop components.

| Perinatal Loss Workshop                                             | Key Message |
|---------------------------------------------------------------------|-------------|
| 11. Introduction                                                    |             |
| 12. St 1: Communicating with families about autopsy                 |             |
| 13. St 2: Autopsy and placental examination                         |             |
| 14. St 3: Investigation of perinatal death                          |             |
| 15. St 4: Examination of babies who die in the perinatal period     |             |
| 16. St 5: Institutional audit & PNM classification                  |             |
| 17. St 6: Psychological and social aspects of perinatal bereavement |             |
| 18. Formative: group oral                                           |             |

# PERINATAL LOSS WORKSHOP

Please describe any aspect of the workshop that you think could be improved.

| Perinatal Loss Workshop                                             | Could be improved |
|---------------------------------------------------------------------|-------------------|
| 19. Introduction                                                    |                   |
| 20. St 1: Communicating with families about autopsy                 |                   |
| 21. St 2: Autopsy and placental examination                         |                   |
| 22. St 3: Investigation of perinatal death                          |                   |
| 23. St 4: Examination of babies who die in the perinatal period     |                   |
| 24. St 5: Institutional audit & PNM classification                  |                   |
| 25. St 6: Psychological and social aspects of perinatal bereavement |                   |
| 26. Formative: group oral                                           |                   |

27. How likely is it that you would recommend this workshop program to a colleague

Not Likely

Highly Likely

1      2      3      4      5      6      7      8      9      10

28. What was the most significant factor that influenced your rating? \_\_\_\_\_

---

---

---

*Thank you for taking the time to complete this evaluation.*
